# Supplementary material for: Excitation-resolved area-normalized emission spectroscopy: a rapid and simple steady-state technique for the analysis of heterogeneous fluorescence
Source: Royal Society of Chemistry journal article supplement (doi:10.1039/c9ra10154c), 2020-01-01
Supplement: c9ra10154c1.pdf [file c9ra10154c1.pdf]

### Electronic Supporting Information

Excitation-Resolved Area Normalized Emission Spectroscopy: A Rapid and Simple Steady-State Technique for the Analysis of Heterogeneous Fluorescence

Kannan Ramamurthy, Karunakaran Ponnusamy and Chellappan Selvaraju\*

*National Centre for Ultrafast Processes, University of Madras, Chennai 600 113, Tamil Nadu, India.*

#### **Contents**

**Figure S1.** ERES (a) and ERANES (b) of C466 in methanol.

**Figure S2.** ERES (a) and ERANES (b) of C102 in methanol.

**Figure S3.** ERES (a) and ERANES (b) of C307 in methanol.

**Figure S4.** ERES (a) and ERANES (b) of C153 in methanol.

**Figure S5.** Absorption (a), ERES (b) and ERANES (c) of C307 and C466 mixture in methanol.

**Figure S6.** TRES (a) and TRANES (b) of C307 and C466 mixture in methanol.

**Figure S7.** Absorption (a), ERES (b) and ERANES (c) of C102 and C153 mixture in methanol.

**Figure S8.** TRES (a) and TRANES (b) spectra of C102 and C153 mixture in methanol.

**Figure S9.** Absorption (a), ERES (b) and ERANES (c) of C307 and C153 mixture in methanol.

**Figure S10.** TRES (a) and TRANES (b) of C307 and C153 mixture in methanol.

**Figure S11.** Absorption (a), ERES (b) and ERANES (c) of C307 and C102 mixture in methanol.

**Figure S12.** TRES (a) and TRANES (b) of C307 and C102 mixture in methanol.

**Figure S13.** Absorption (a), ERES (b) and ERANES (c) of C102 and C466 mixture in methanol.

**Figure S14.** TRES (a) and TRANES (b) of C102 and C466 mixture in methanol.

**Figure S15.** ERES (a) and ERANES (b) of tryptophan and tyrosine mixture in phosphate buffer solution.

**Figure S16.** TRES (a) and TRANES (b) of C466, C307 and C153 mixture in methanol.

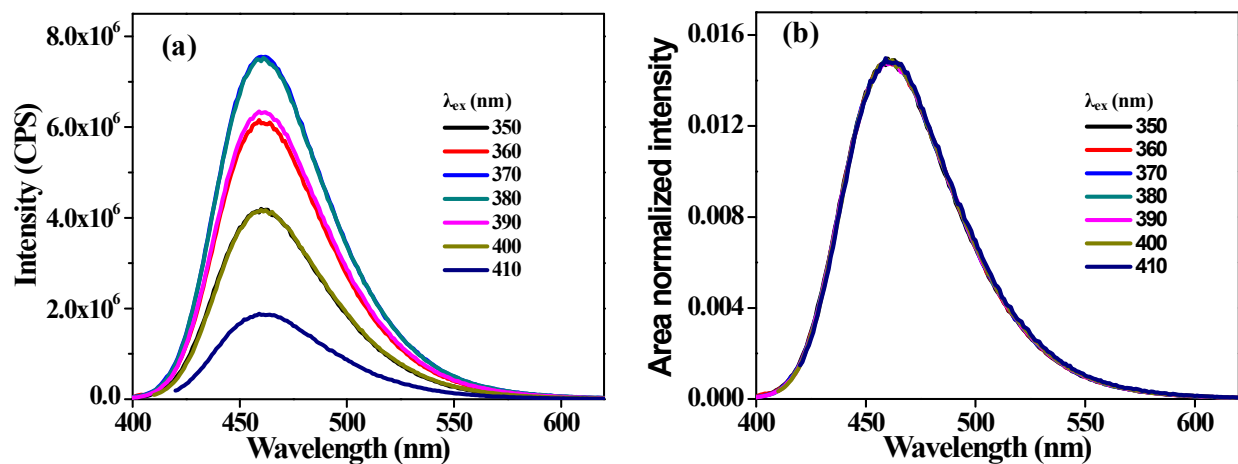

**Figure S1.** ERES (a) and ERANES (b) of C466 in methanol. No isoemissive point in the ERANES of C466 dye and found to be independent of excitation wavelength.

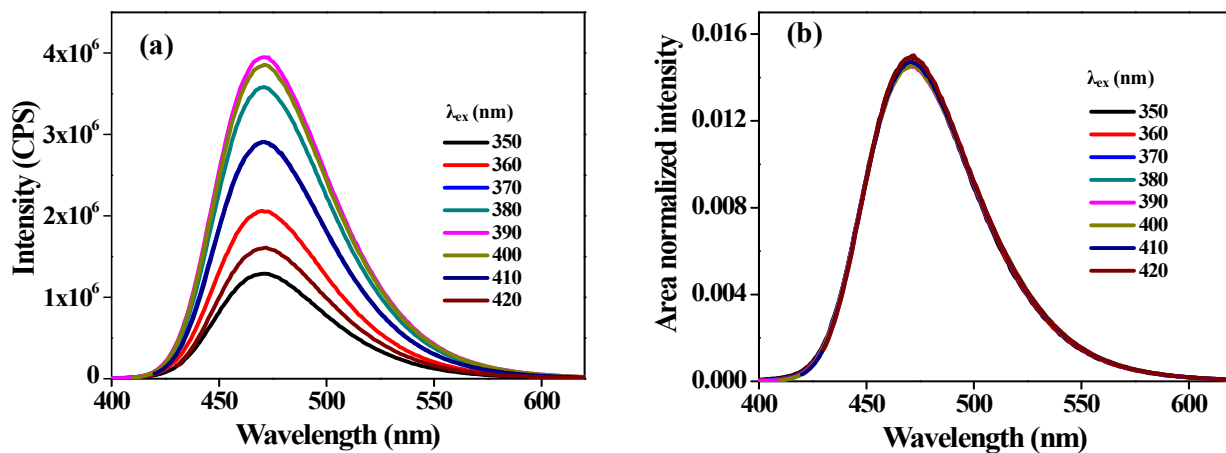

**Figure S2.** ERES (a) and ERANES (b) of C102 in methanol. No isoemissive point in the ERANES of C102 dye and found to be independent of excitation wavelength.

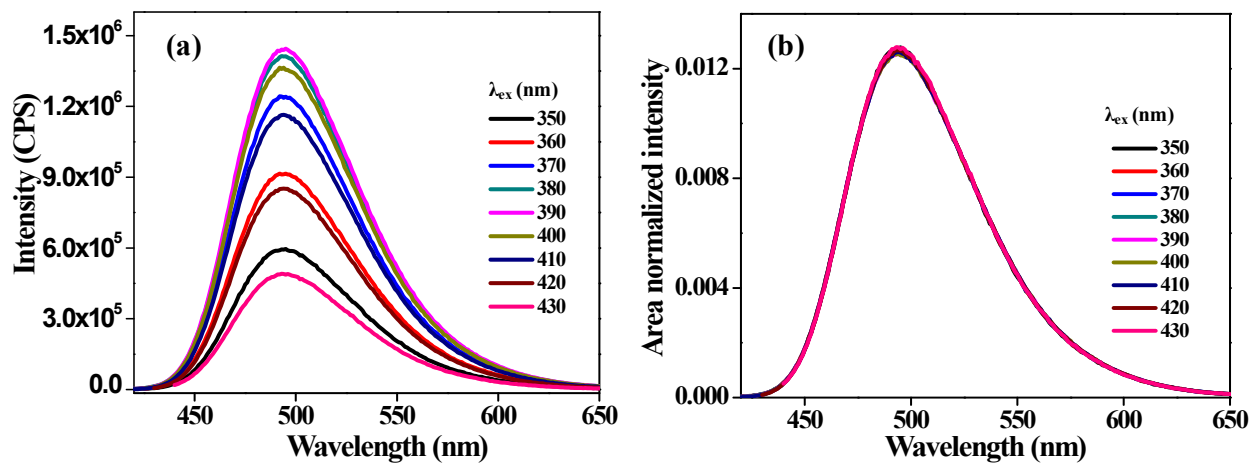

**Figure S3.** ERES (a) and ERANES (b) of C307 in methanol. No isoemissive point in the ERANES of C307 dye and found to be independent of excitation wavelength.

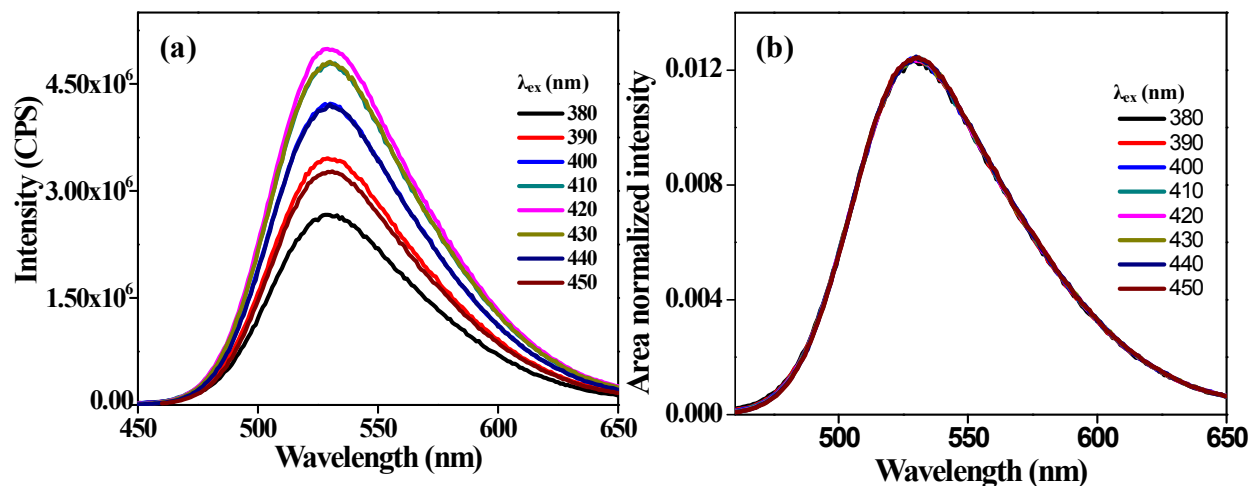

**Figure S4.** ERES (a) and ERANES (b) of C153 in methanol. No isoemissive point in the ERANES of C153 dye and found to be independent of excitation wavelength.

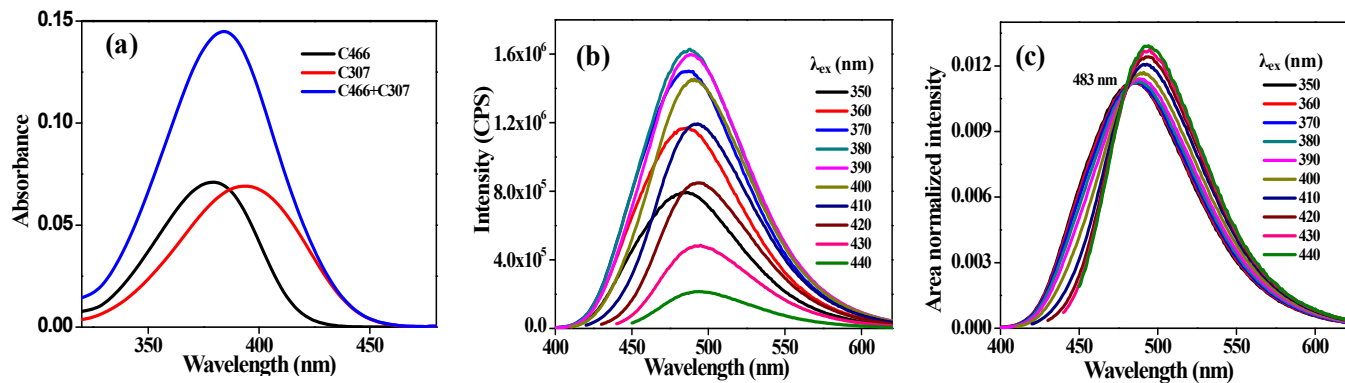

**Figure S5.** Absorption (a), ERES (b) and ERANES (c) of C307 and C466 mixture in methanol.

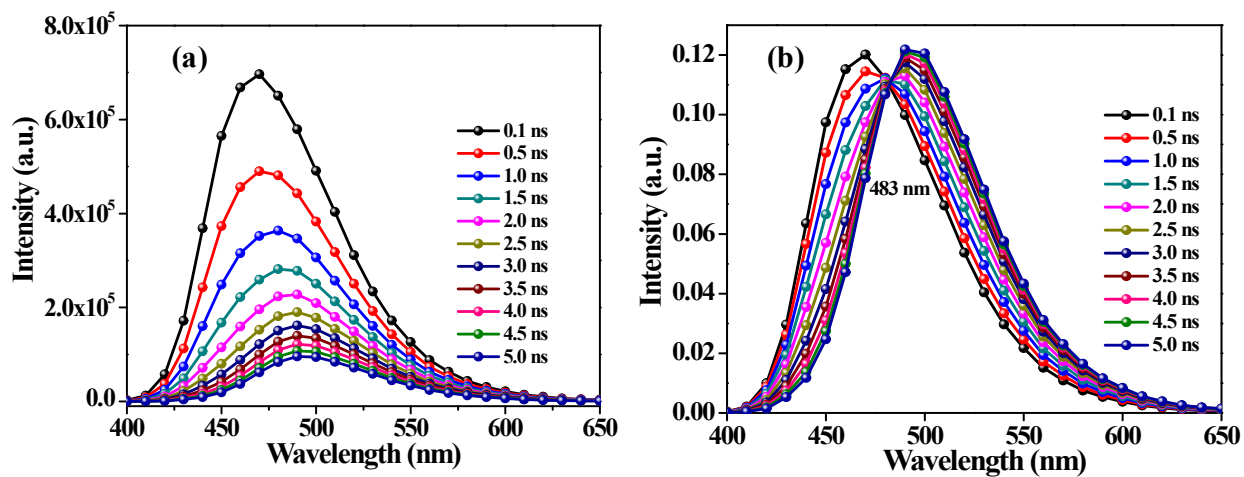

**Figure S6.** TRES (a) and TRANES (b) of C307 and C466 mixture in methanol. The ground state heterogeneity is resolved with isoemissive point 483 nm in the TRANES analysis.  $\lambda_{\text{ex}} = 375$  nm.

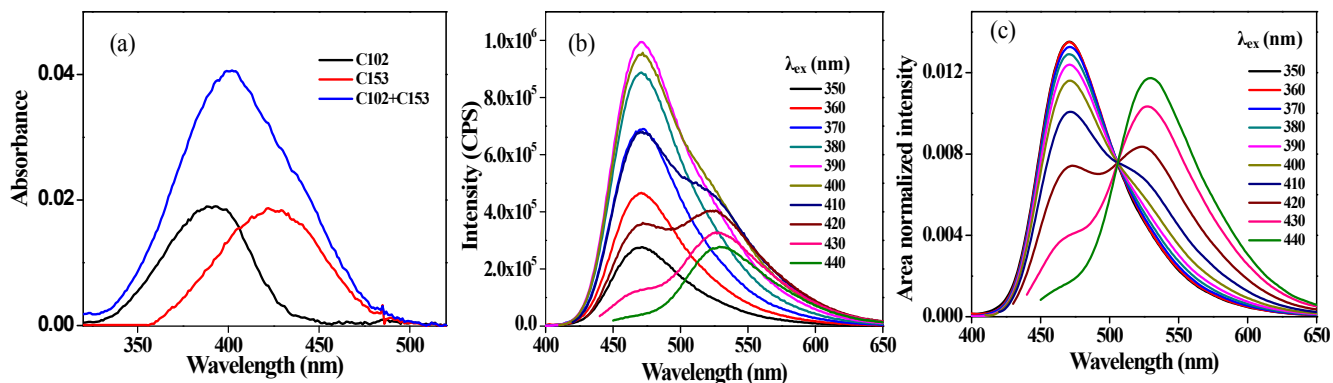

**Figure S7.** Absorption (a), ERES (b) and ERANES (c) of C102 and C153 mixture in methanol.

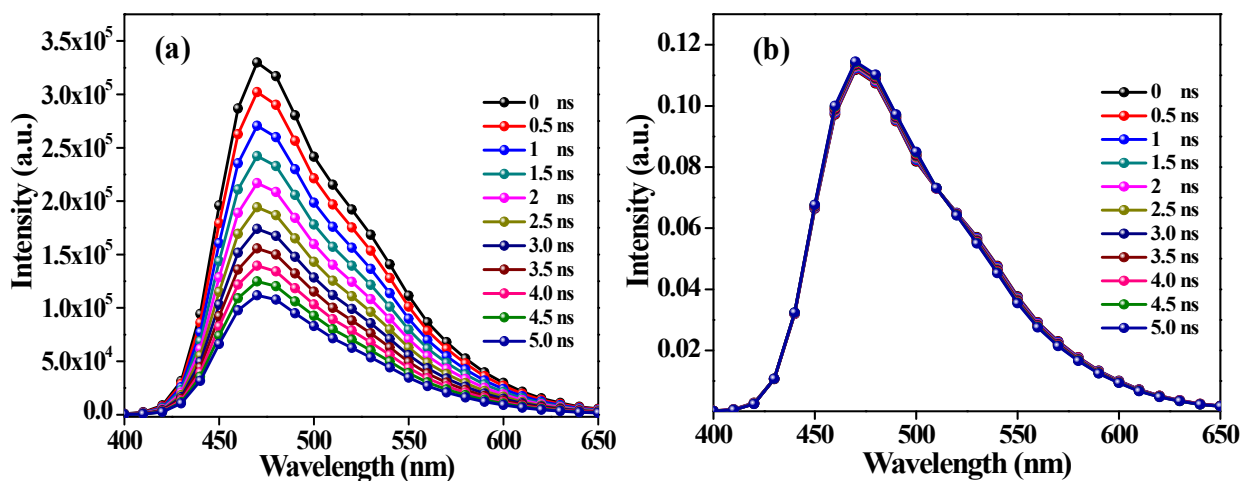

**Figure S8.** TRES (a) and TRANES (b) of C102 and C153 in methanol. The GSH was not resolved due to absence of clear isoemissive point in the TRANES analysis.  $\lambda_{\text{ex}} = 375 \text{ nm}$

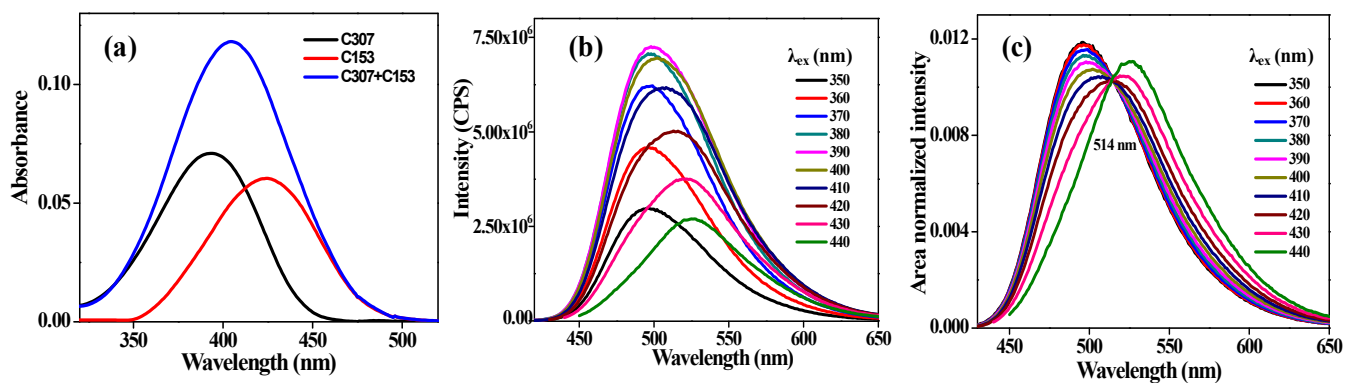

**Figure S9.** Absorption (a), ERES (b) and ERANES (c) of C307 and C153 mixture in methanol.

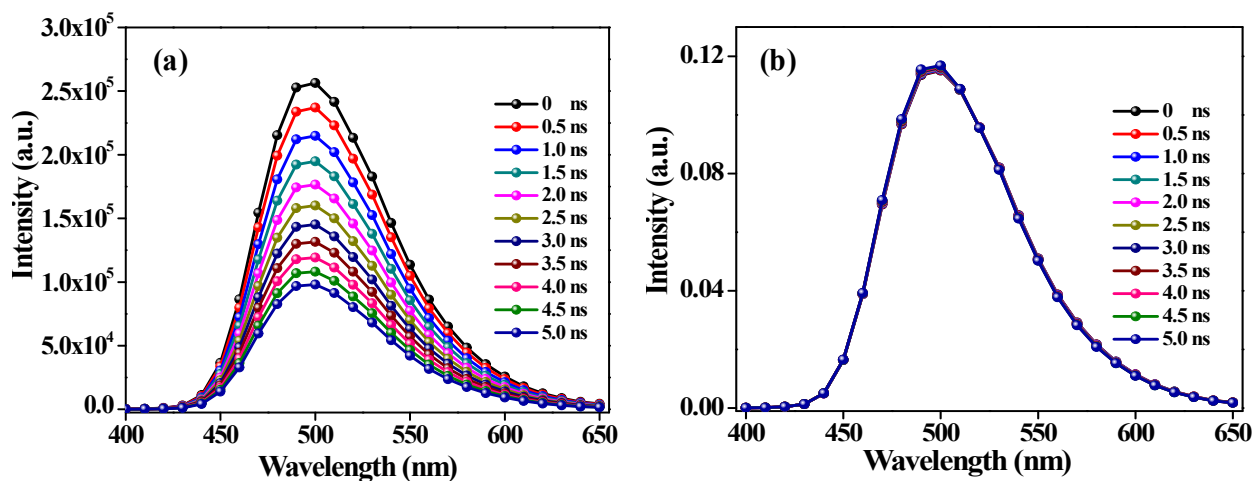

**Figure S10.** TRES (a) and TRANES (b) of C307 and C153 mixture in methanol. The GSH was not resolved due to absence of clear isoemissive point in the TRANES analysis.  $\lambda_{\text{ex}} = 375 \text{ nm}$

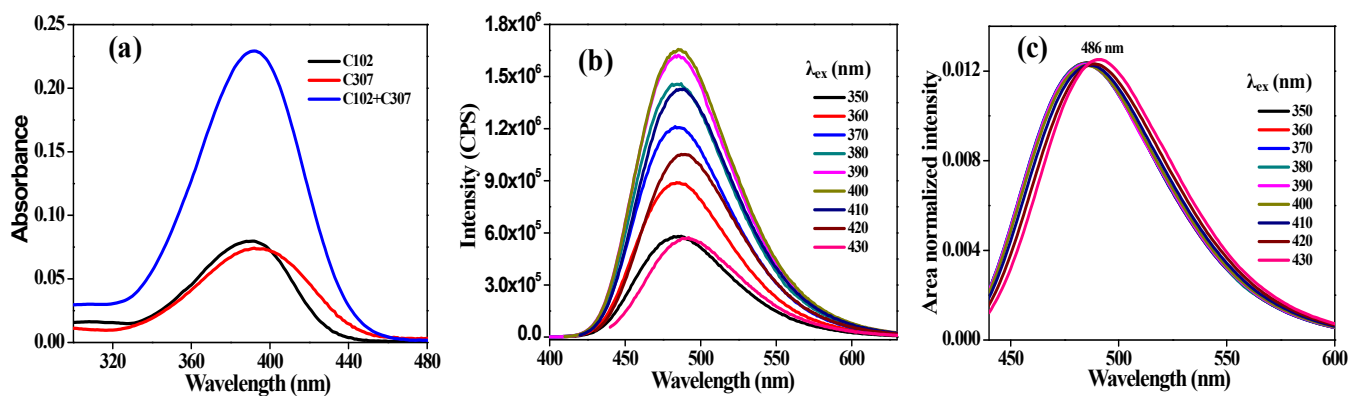

**Figure S11.** Absorption (a), ERES (b) and ERANES (c) of C307 and C102 mixture in methanol.

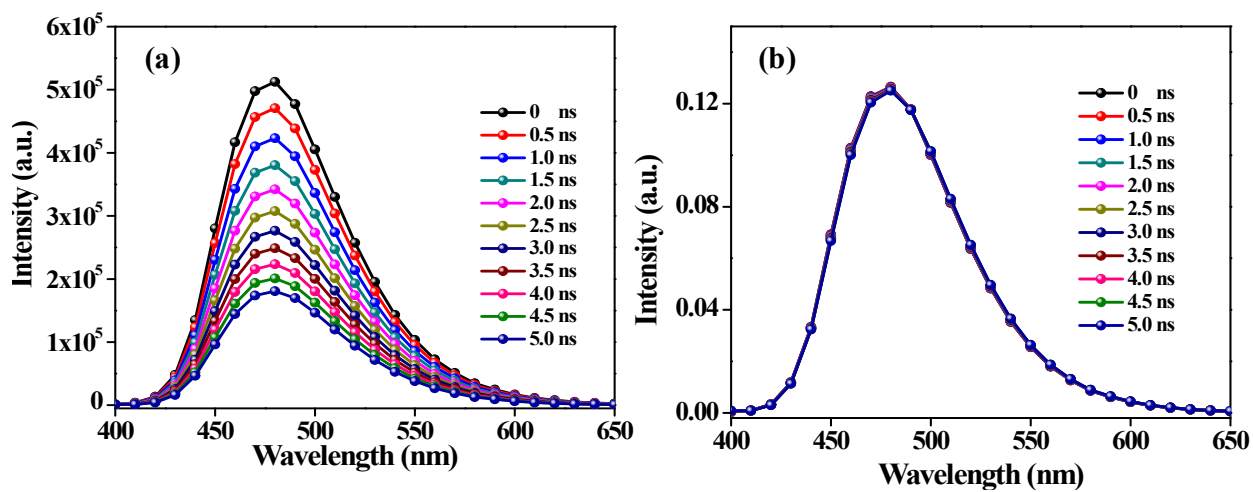

**Figure S12.** TRES (a) and TRANES (b) of C307 and C102 mixture in methanol. The GSH was not resolved due to absence of clear isoemissive point in the TRANES analysis.  $\lambda_{\text{ex}} = 375 \text{ nm}$ .

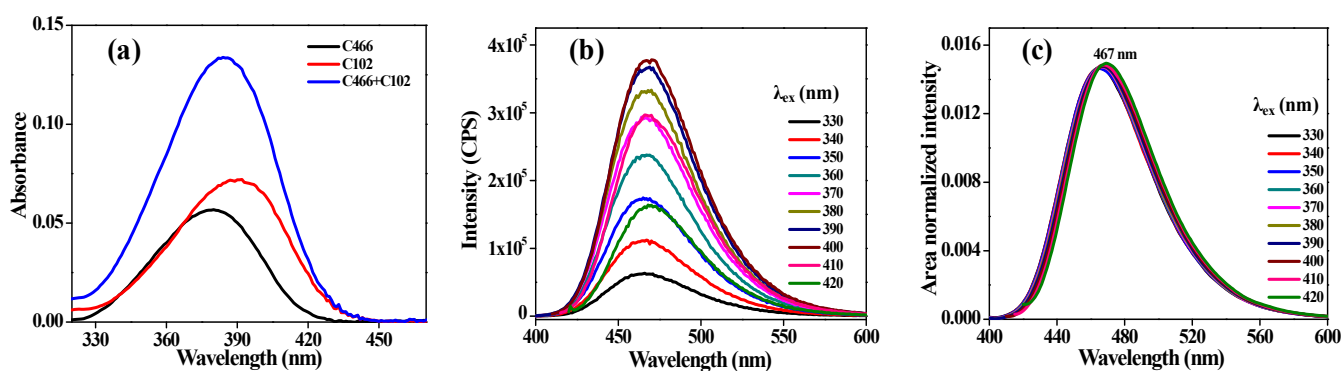

**Figure S13.** Absorption (a), ERES (b) and ERANES (c) of C102 and C466 mixture in methanol.

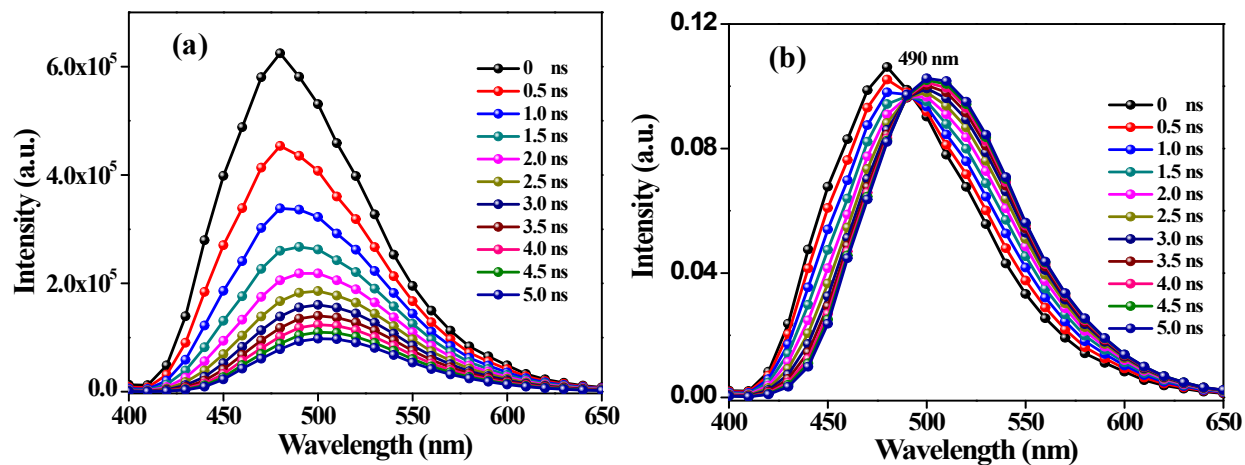



**Figure S14.** TRES (a) and TRANES (b) of C102 and C466 mixture in methanol. The ground state heterogeneity is resolved with isoemissive point 490 nm in the TRANES analysis.  $\lambda_{\text{ex}} = 375$  nm.

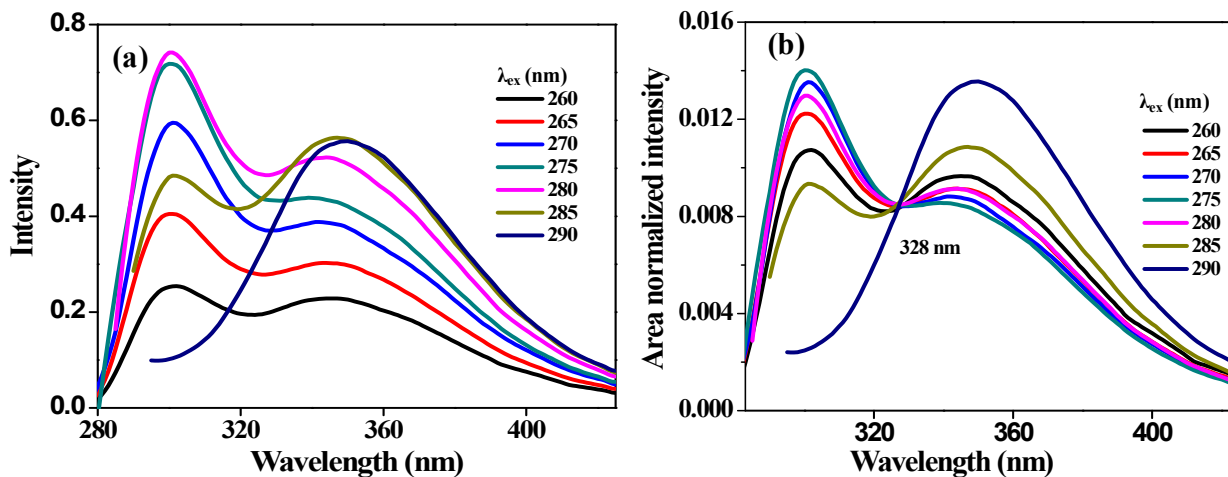

**Figure S15.** ERES (a) and ERANES (b) of Tryptophan and Tyrosine mixture in phosphate buffer solution.

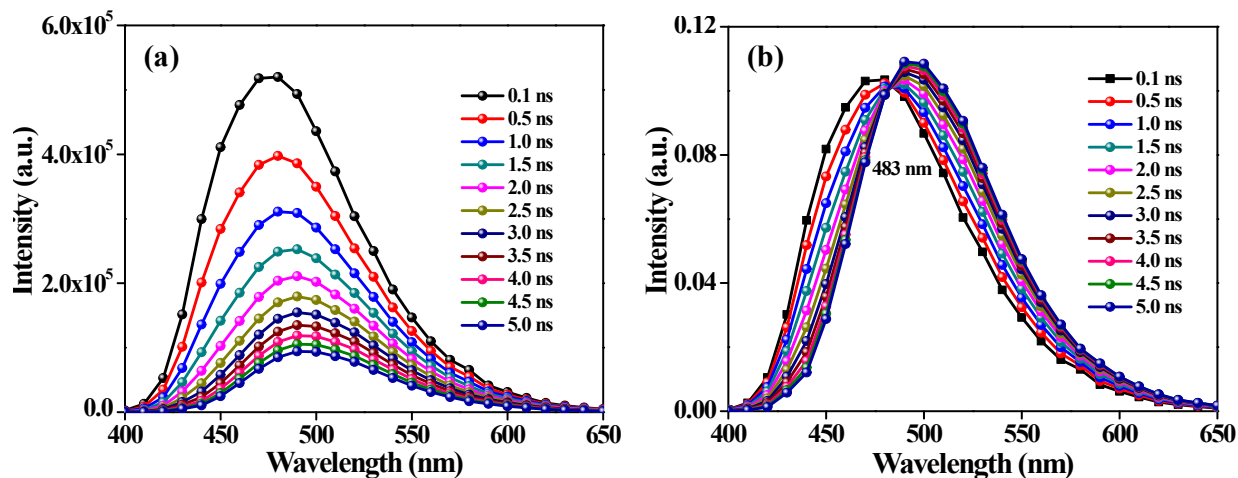

**Figure S16.** TRES (a) and TRANES (b) of C466, C307 and C153 mixture in methanol. The ground state heterogeneity is resolved with isoemissive point 483 nm in the TRANES analysis.

$\lambda_{\text{ex}} = 375$  nm.
